# Supplementary material for: Layer-by-Layer Nanoparticles of Tamoxifen and Resveratrol for Dual Drug Delivery System and Potential Triple-Negative Breast Cancer Treatment
Source: MDPI journal article supplement (doi:10.3390/pharmaceutics13071098), 2021-07-20
Supplement: s1 [file s1]

# Supplementary Materials: Layer-by-Layer Nanoparticles of Tamoxifen and Resveratrol for Dual Drug Delivery System and Potential Triple-Negative Breast Cancer Treatment

Ali A. Al-jubori, Ghassan M. Sulaiman, Amer T. Tawfeeq, Hamdoon A. Mohammed, Riaz A. Khan and Salman A. A. Mohammed

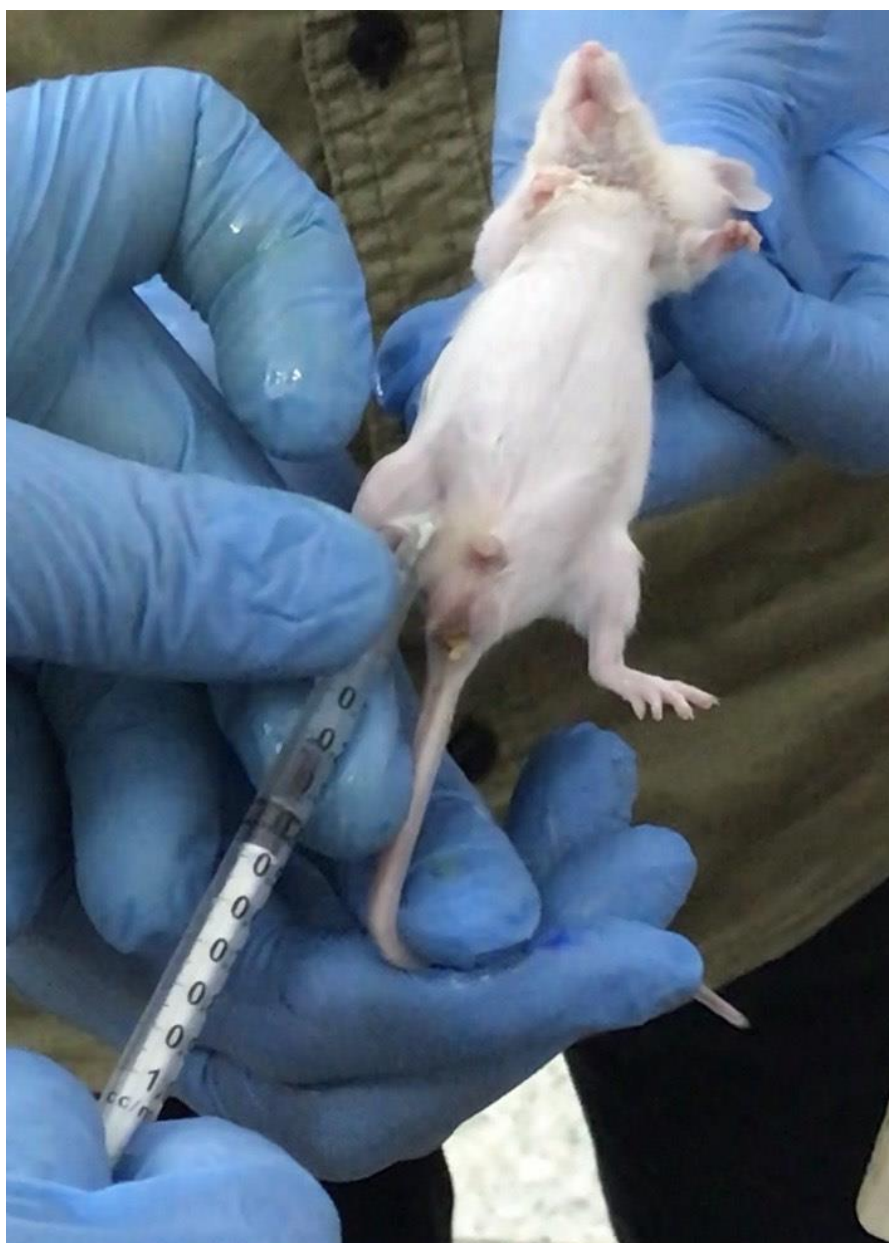

**Figure S1.** Image showing intraperitoneal (i.p.) injection of TAM/RES-LbL-LCNPs.

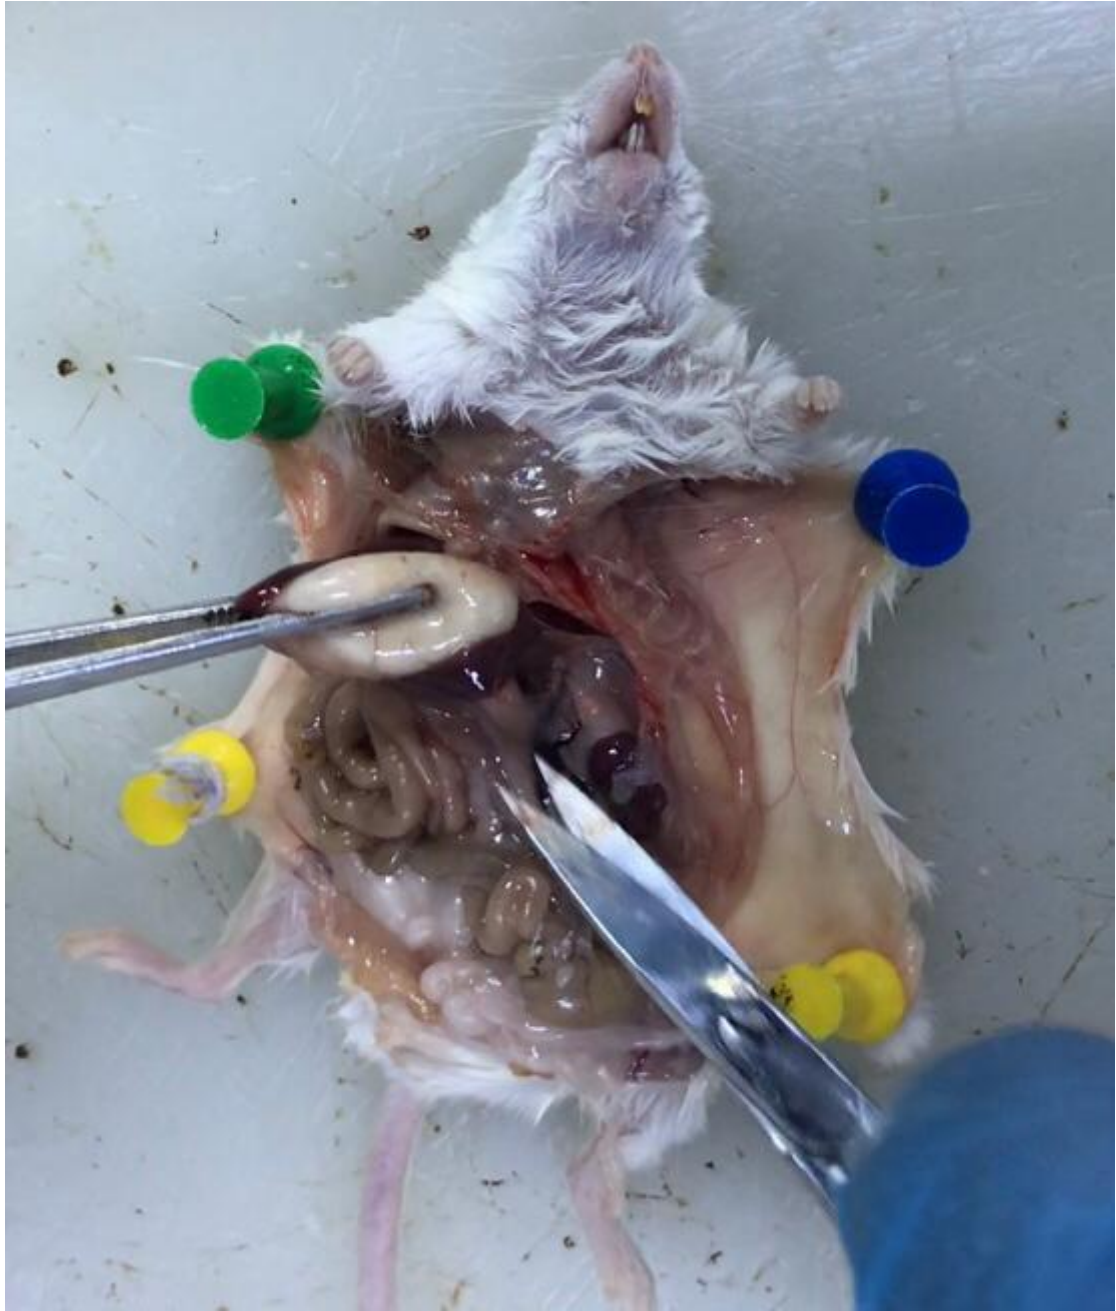

**Figure S2.** Image showing the dissection of mice at the end of the experiment.

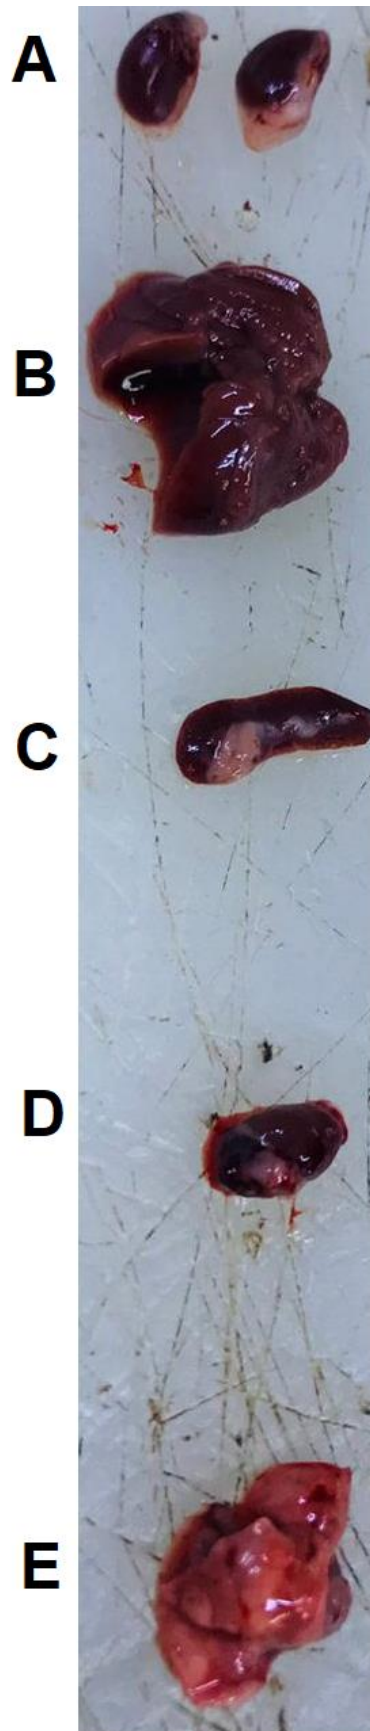

**Figure S3.** Image showing isolated mouse organs kidney (A), liver (B), spleen (C), heart (D) and lungs (E) at the end of the experiment.
